# Supplementary material for: Novelty is not surprise: Human exploratory and adaptive behavior in sequential decision-making
Source: PLOS journal article supplement (doi:10.1371/journal.pcbi.1009070), 2021-06-03
Supplement: S4 (10.1371/journal.pcbi.1009070.s004) [file journal.pcbi.1009070.s004]

## Supplementary Information S4 Text: The analysis of random exploration

He A. Xu, Alireza Modirshanechi\*, Marco P. Lehmann, Wulfram Gerstner, Michael H. Herzog

\* alireza.modirshanechi@epfl.ch

For any stationary policy (e.g., random choice), the sequence of states  $\{S_1, S_2, \dots\}$  forms a stationary Markov chain. Let us define the random variable  $\mathcal{T}$  as the time of the 1st encounter of the goal state, i.e.,  $\mathcal{T}$  is the length of the 1st episode. We connect the expected number  $\tau_i$  of actions to find the goal starting from state  $S_1 = i$  (with  $i \in \{1, \dots, 10\}$ ) to the expected number of actions  $\tau_j$  in the possible *next* states  $S_2 = j$ ,

$$\tau_i = \mathbb{E}[\mathcal{T} | S_1 = i] = 1 + \sum_{j=1}^{10} p_{ij} \tau_j, \quad (1)$$

where  $p_{ij}$  is the probability of transitioning from state  $i$  to state  $j$  (dependent on the stationary policy), and we have already exploited that the goal state does not contribute in the sum because  $\tau_G$  is by definition zero.

For a random policy (0.25 probability for each of the four actions) and the layout of the environment in Fig 1 in the main text, we find  $\tau_{\text{trap}} := \tau_8 = \tau_9 = \tau_{10} = \tau_1 + 4$ , because it takes on average 4 actions to leave the trap states. Similarly, from state 7, you have a probability of 1/4 to reach the goal in one step, but you can also remain in state 7 or go to one of the trap states. Evaluating all possibilities we arrive at

$$\begin{aligned} \tau_{\text{trap}} &= \tau_1 + 4, \\ \tau_{i+1} &= 3\tau_i - 2\tau_{\text{trap}} - 4 \text{ for } i \in \{1, \dots, 6\}, \\ \tau_7 &= \frac{4}{3} + \frac{2}{3}\tau_{\text{trap}}. \end{aligned} \quad (2)$$

By solving this set of linear equations, we find

$$\begin{aligned} \tau_1 &= 13116, \quad \tau_2 = 13104, \quad \tau_3 = 13068, \quad \tau_4 = 12960 \\ \tau_5 &= 12636, \quad \tau_6 = 11664, \quad \tau_7 = 8748 \\ \tau_8 &= \tau_9 = \tau_{10} = \tau_{\text{trap}} = 13120. \end{aligned} \quad (3)$$

The results of calculation show that, starting from state 6 (which is the starting state of the first episode in our experiments), it takes on average more than 10000 actions to find the goal with a random policy.
